# Supplementary material for: Water-soluble, highly emissive, color-tunable, and stable Cu-doped ZnSeS/ZnS core/shell nanocrystals
Source: Royal Society of Chemistry journal article supplement (doi:10.1039/c3ce42273a), 2014-01-01
Supplement: c3ce42273a1.pdf [file c3ce42273a1.pdf]

## Supporting Information

### **Water-Soluble, Highly Emissive, Color-Tunable, and Stable Cu-doped ZnSeS/ZnS Core/Shell Nanocrystals**

Ruosheng Zeng,<sup>\*a</sup> Rongan Shen,<sup>a</sup> Yunqiang Zhao,<sup>a</sup> Zhiguo Sun,<sup>a</sup> Xingsheng Li,<sup>a</sup> Jinju Zheng,<sup>b</sup>

Sheng Cao,<sup>b</sup> and Bingsuo Zou,<sup>\*c</sup>

<sup>a</sup> Key Lab for Functional Materials Chemistry of Guizhou Province, School of Chemistry and Materials Science, Guizhou Normal University, Guiyang 550001, China

<sup>b</sup> Institute of Materials, Ningbo University of Technology, Ningbo 315016, China

<sup>c</sup> Beijing Key Laboratory of Nanophotonics & Ultrafine Optoelectronic Systems, Beijing Institute of Technology, Beijing 100081, China

Corresponding author: [zengrsh@gznu.edu.cn](mailto:zengrsh@gznu.edu.cn)

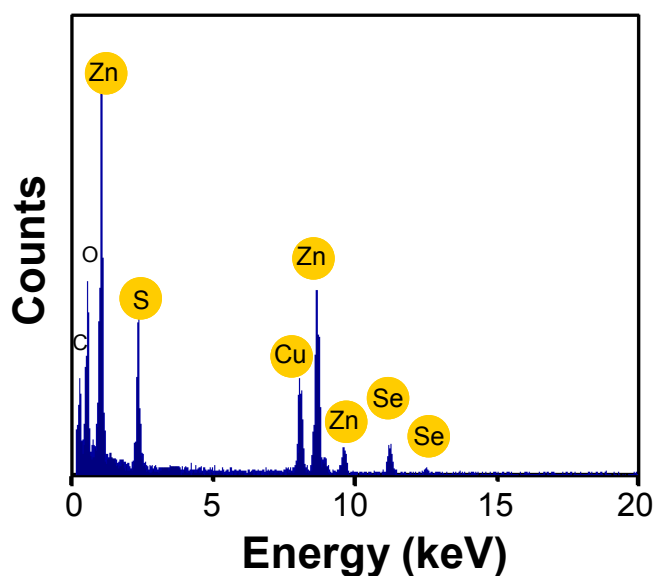

Figure S1. EDX of Cu:ZnSeS d-dots

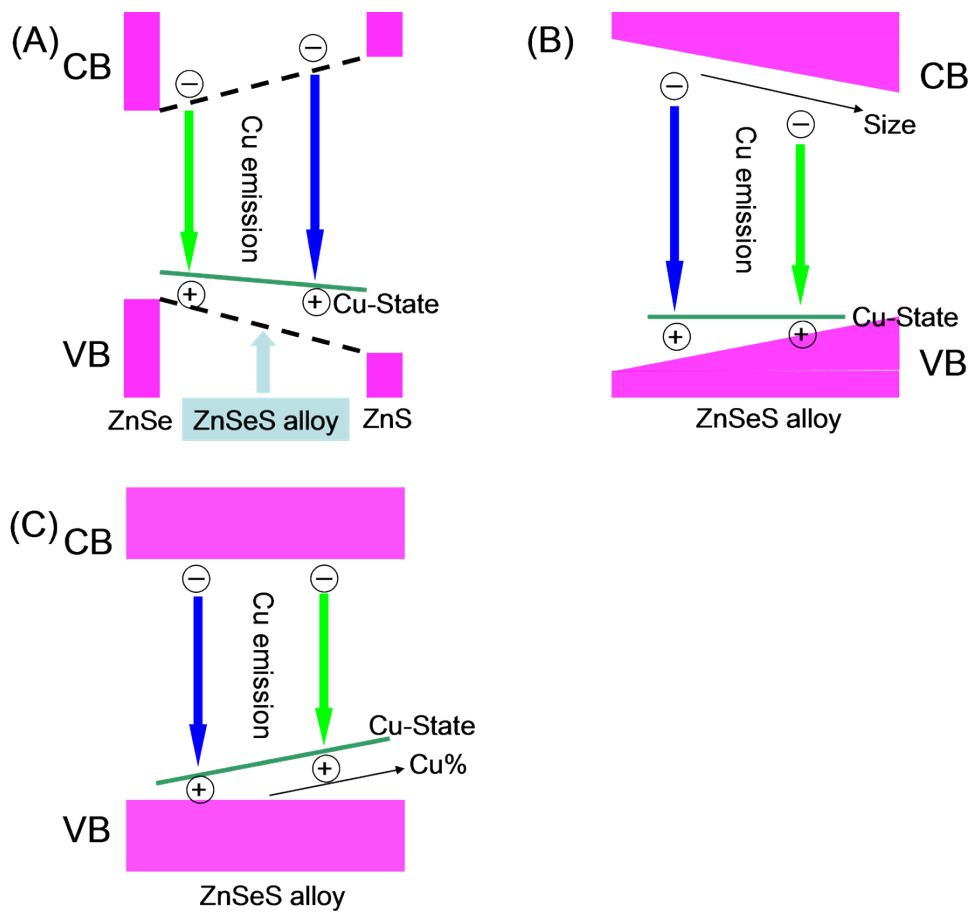

Figure S2. The correlated energy state diagram of Cu-doped ZnSeS alloy nanocrystals for influence of MPA amount (A), pH value (B) and Cu-doping Concentration (C).

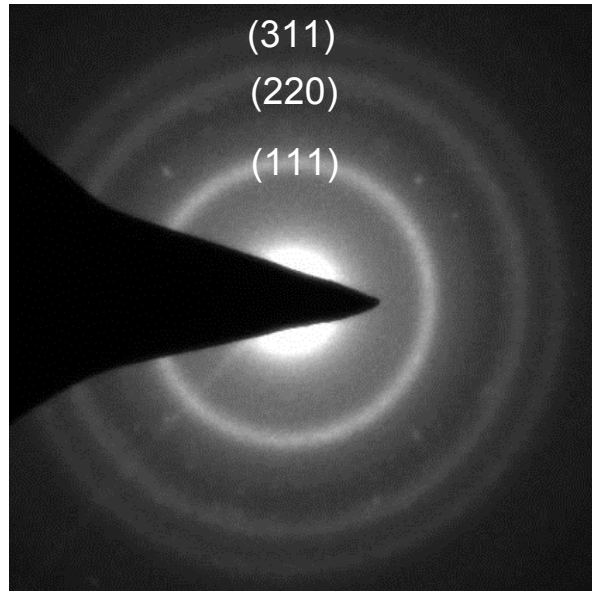

Figure S3. A typical electron diffraction pattern of Cu:ZnSeS/ZnS d-dots.
